1 **Fast and robust detection of colistin resistance in *Escherichia coli* using the**  
2 **MALDI Biotyper Sirius mass spectrometry system**

3

4 R. Christopher D. FURNISS<sup>1</sup>, Laurent DORTET<sup>1,2,3,4</sup>, William BOLLAND<sup>1</sup>, Oliver  
5 DREWS<sup>5</sup>, Katrin SPARBIER<sup>5</sup>, Rémy A. BONNIN<sup>2,3,4</sup>, Alain FILLOUX<sup>1</sup>, Markus  
6 KOSTRZEWA<sup>5</sup>, Despoina A.I. MAVRIDOU<sup>1\*</sup> and Gerald LARROUY-MAUMUS<sup>1\*</sup>

7

8 <sup>1</sup>MRC Centre for Molecular Bacteriology and Infection, Department of Life Sciences,  
9 Faculty of Natural Sciences, Imperial College London, London, SW7 2AZ, UK

10 <sup>2</sup>Department of Bacteriology- Hygiene, Bicêtre Hospital, Assistance Publique - Hôpitaux de  
11 Paris, Le Kremlin-Bicêtre, France

12 <sup>3</sup>EA7361 “Structure, dynamic, function and expression of broad spectrum  $\beta$ -lactamases”,  
13 Paris-Sud University, LabEx Lermite, Faculty of Medicine, Le Kremlin-Bicêtre, France

14 <sup>4</sup>French National Reference Centre for Antibiotic Resistance, France

15 <sup>5</sup>Bruker Daltonik GmbH, Bremen, Germany

16

17 **Running title:** Detection of colistin resistance by MALDI-TOF

18

19 **\*Corresponding authors:**

20 Dr Despoina A.I. Mavridou

21 MRC Centre for Molecular Bacteriology and Infection, Department of Life Sciences, Faculty  
22 of Natural Sciences, Imperial College London, London, SW7 2AZ, UK

23 Telephone: +44 (0) 2075 49936

24 E-mail: [d.mavridou@imperial.ac.uk](mailto:d.mavridou@imperial.ac.uk)

25

26 Dr Gerald Larrouy-Maumus  
27 MRC Centre for Molecular Bacteriology and Infection, Department of Life Sciences, Faculty  
28 of Natural Sciences, Imperial College London, London, SW7 2AZ, UK  
29 Telephone: +44 (0) 2075 947463  
30 E-mail: [g.larrouy-maumus@imperial.ac.uk](mailto:g.larrouy-maumus@imperial.ac.uk)

31 **ABSTRACT**

32 Polymyxin antibiotics are a last-line treatment for multidrug-resistant Gram-negative  
33 bacteria. However, the emergence of colistin resistance, including the spread of mobile *mcr*  
34 genes, necessitates the development of improved diagnostics for the detection of colistin-  
35 resistant organisms in hospital settings. The recently developed MALDIxin test enables  
36 detection of colistin resistance by MALDI-TOF mass spectrometry in less than 15 minutes  
37 but is not optimized for the mass spectrometers commonly found in clinical microbiology  
38 laboratories. In this study, we adapted the MALDIxin test for the MALDI Biotyper Sirius  
39 MALDI-TOF mass spectrometry system (Bruker Daltonics). We optimized the sample  
40 preparation protocol using a set of 6 MCR-expressing *Escherichia coli* clones and validated the  
41 assay with a collection of 40 *E. coli* clinical isolates, including 19 MCR producers, 12  
42 chromosomally-resistant isolates and 9 polymyxin-susceptible isolates. We calculated  
43 Polymyxin resistance ratio (PRR) values from the acquired spectra; a PRR value of zero,  
44 indicating polymyxin susceptibility, was obtained for all colistin-susceptible *E. coli* isolates,  
45 whereas positive PRR values, indicating resistance to polymyxins, were obtained for all  
46 resistant strains independent of the genetic basis of resistance. Thus, we report a preliminary  
47 feasibility study showing that an optimized version of the MALDIxin test, adapted for the  
48 routine MALDI Biotyper Sirius, provides an unbiased, fast, reliable, cost-effective and high-  
49 throughput way of detecting colistin resistance in clinical *E. coli* isolates.

50 **INTRODUCTION**

51 Antibiotic resistance is an issue of global importance and one of the defining public health  
52 concerns of our time (1). The limited pipeline of novel antimicrobials and the spread of  
53 multidrug-resistant (MDR) organisms have increased our reliance on a few last-line  
54 antibiotics for the treatment of MDR Gram-negative bacteria. Chief amongst these last-resort  
55 agents are the polymyxin antibiotics, polymyxin B and colistin (2, 3).

56

57 In Gram-negative bacteria like *Escherichia coli*, polymyxin resistance mostly occurs as a  
58 consequence of lipopolysaccharide (LPS) modifications, in the form of addition of the  
59 cationic groups phosphoethanolamine (pETN) and/or 4-amino-L-arabinose (L-Ara4N) to the  
60 Lipid A portion of LPS (4, 5). These Lipid A modifications often arise due to alterations to  
61 the PmrAB and PhoPQ two-component systems, mutations to the negative regulator of  
62 PhoPQ, MgrB, or because of the activity of plasmid-borne pETN transferases called mobile  
63 colistin resistance (MCR) enzymes (6). The first MCR enzyme, MCR-1, was reported in  
64 2016 (7) and this discovery was followed by the rapid identification of other mobile  
65 polymyxin resistance genes. To date a further eight MCR proteins have been described.  
66 These enzymes cluster into four main groups: MCR-1-like (MCR-1, -2, -6), MCR-3-like  
67 (MCR-3, -7, -8, -9), MCR-4-like (MCR-4) and MCR-5-like (MCR-5) (8-11).

68

69 Detection of colistin resistance currently relies on minimum inhibitory concentration (MIC)  
70 determination using broth microdilution (BMD), a slow process which, despite being the gold  
71 standard for polymyxin susceptibility testing, has been subject to reliability and  
72 standardization problems (6, 12). Additionally, routine detection of colistin resistance by  
73 conventional methods such as polymerase-chain-reaction (PCR)-based testing is challenging  
74 due to the wide range of chromosomal mutations which can give rise to colistin resistance (6)

75 and the low sequence identity of the *mcr* genes (using *mcr-1* as a reference: *mcr-2*, 77.6%;  
76 *mcr-3*, 49.2%; *mcr-4*, 46.8%; *mcr-5*, 50.5%; *mcr-6*, 78.3%; *mcr-7*, 49.9%; *mcr-8*, 47.8%;  
77 *mcr-9*, 57.69%). This means that PCR-based detection methods are insensitive to all but the  
78 best-characterized chromosomal mutations and to the emergence of new *mcr* genes.  
79 Therefore, there is an urgent need to develop a fast, robust and high-throughput assay,  
80 accessible to all diagnostic microbiology laboratories, that uses an unbiased approach to  
81 detect colistin resistance arising from both known and novel chromosomal mutations or MCR  
82 proteins.

83

84 Recently we developed the MALDIxin test, a diagnostic tool based on Matrix-assisted laser  
85 desorption/ionization-time of flight (MALDI-TOF) mass spectrometry that can be used to  
86 detect colistin resistance using intact bacteria in less than 15 minutes (13, 14). Although fast  
87 and effective, this test was not optimized for routine use in diagnostic microbiology  
88 laboratories, the main limitation being that it was not developed for the MALDI-TOF mass  
89 spectrometers widely used for bacterial identification in these settings. More specifically, our  
90 previous studies were performed on a research instrument operating in the high-resolution  
91 reflector mode, whilst MALDI-TOF systems in clinical microbiology laboratories employ  
92 lower resolution linear mode measurements. Here, we report a preliminary feasibility study  
93 showing that an optimized version of the MALDIxin test, designed for the low-resolution  
94 linear mode employed by the MALDI Biotyper Sirius system (Bruker Daltonics), accurately  
95 identifies colistin resistance in clinical *E. coli* isolates irrespective of its genetic basis by  
96 detecting addition of both pETN and L-Ara4N moieties to Lipid A.

97 **MATERIALS AND METHODS**

98

99 **Bacterial strains.** For the construction of MCR-producing *E. coli* clones (Table 1), *mcr* variants  
100 were cloned into pDM1 (GenBank MN128719), an isopropyl  $\beta$ -D-1-thiogalactopyranoside  
101 (IPTG)-inducible derivative of pACYC184; protein expression from this vector is only induced  
102 after addition of IPTG to the culture media. For *mcr-1*, *mcr-2*, *mcr-4*, *mcr-5* and *mcr-8* the  
103 SacI/XmaI sites of the vector were used, whilst for *mcr-3*, the NdeI/XmaI sites were used. A  
104 collection of 40 *E. coli* clinical isolates (Table 1), including 19 MCR producers, 12  
105 chromosomally-resistant isolates and 9 colistin susceptible isolates, was used for validation of  
106 the MALDIxin test.

107

108 **Genotype determination.** PCR-based amplification and DNA sequencing was used to determine  
109 the genotypes of clinical isolates (Table 1), as necessary. Identification of *mcr* genes was  
110 performed by multiplex PCR as previously described (15) and  $\beta$ -lactamases genes were  
111 identified using in-house multiplex PCR protocols.

112

113 **Susceptibility testing.** Colistin MICs for clinical isolates were manually determined using BMD,  
114 according to the Clinical and Laboratory Standards Institute (CLSI) and the European  
115 Committee on Antimicrobial Susceptibility Testing (EUCAST) guidelines. As such, cation-  
116 adjusted Mueller-Hinton broth was used in conjunction with plain polystyrene laboratory  
117 consumables and the sulfate salt of colistin. No additives were used at any stage of the testing  
118 process. For the laboratory *E. coli* clones, which were only used for protocol optimization,  
119 0.5 mM IPTG was added to the BMD growth media to induce expression of the MCR enzymes.  
120 The colistin MIC of all tested strains was determined three times and was found to be identical

121 at each repeat. Results were interpreted using EUCAST breakpoints as updated in 2018  
122 ([http://www.eucast.org/clinical\\_breakpoints/](http://www.eucast.org/clinical_breakpoints/)).

123

124 ***Optimized MALDIxin test for the MALDI Biotyper Sirius.*** A 10  $\mu\text{L}$  inoculation loop of  
125 bacteria, grown on Mueller-Hinton agar for 18-24 hours, was resuspended in 200  $\mu\text{L}$  of  
126 water. Mild-acid hydrolysis was performed on 100  $\mu\text{L}$  of this suspension, by adding 100  $\mu\text{l}$  of  
127 2 v/v % acetic acid and incubating the mixture at 98°C for 10 min. Hydrolyzed cells were  
128 centrifuged at 17,000  $\times g$  for 2 min, the supernatant was discarded and the pellet was  
129 resuspended in ultrapure water to a density of McFarland 10. 0.4  $\mu\text{L}$  of this suspension was  
130 loaded onto the target and immediately overlaid with 1.2  $\mu\text{L}$  of a matrix consisting of a 9:1  
131 mixture of 2,5-dihydroxybenzoic acid and 2-hydroxy-5-methoxybenzoic acid (super-DHB)  
132 (Sigma Aldrich) dissolved in 90/10 v/v chloroform/methanol to a final concentration of  
133 10 mg/mL. The bacterial suspension and matrix were mixed directly on the target by  
134 pipetting and the mix dried gently under a stream of air for less than one minute. MALDI-  
135 TOF mass spectrometry analysis was performed with a MALDI Biotyper Sirius, (Bruker  
136 Daltonics) using the newly introduced linear negative-ion mode.

137

138 ***Data analysis.*** Manual peak picking at masses relevant to colistin resistance was performed  
139 on the obtained mass spectra and the corresponding signal intensities at these defined masses  
140 was determined. The sum of the intensities of the Lipid A peaks attributed to addition of  
141 pETN ( $m/z$  1919.2) and L-Ara4N ( $m/z$  1927.2) was divided by the intensity of the peak  
142 corresponding to native Lipid A ( $m/z$  1796.2). The resulting value is termed the polymyxin  
143 resistance ratio (PRR). A PRR of zero indicates colistin susceptibility, whilst a positive value  
144 indicates colistin resistance. PRR<sup>1919</sup> values were determined by dividing the intensity of the  
145 peak at  $m/z$  1919 alone by the native Lipid A peak and PRR<sup>1927</sup> values were determined by

146 dividing the intensity of the peak at  $m/z$  1927 alone by the native Lipid A peak. All mass  
147 spectra were generated and analyzed in technical triplicate (i.e. measurements of each sample  
148 were repeated three times) and biological triplicate (i.e. the entire experiment was repeated on  
149 three separate days using separately grown bacteria and separate materials).



150 **RESULTS**

151

152 To allow the use of the MALDIxin test on the MALDI Biotyper Sirius system it was  
153 necessary to optimize the sample preparation protocol. This optimization was carried out  
154 using a panel of six isogenic *E. coli* clones expressing representative members of each of the  
155 major MCR groups (MCR-1, -2, -3, -4, -5, -8) and an *E. coli* clone carrying the expression  
156 vector (pDM1) alone (Table 1). For the *E. coli* clone carrying only the expression vector, the  
157 negative mass spectrum, scanned between  $m/z$  1,600 and 2,200, is dominated by a set of  
158 peaks assigned to bis-phosphorylated hexa-acyl Lipid A. The major peak at  $m/z$  1796.2  
159 corresponds to hexa-acyl diphosphoryl Lipid A containing four C14:0 3-OH, one C14:0 and  
160 one C12:0, referred to as native Lipid A (Figure 1, top row). For *E. coli* clones expressing  
161 MCR enzymes, the addition of pETN to the 1-phosphate of native Lipid A leads to an  
162 additional peak ( $m/z$  1919.2) shifted by +123  $m/z$  compared to the mass of the major peak at  
163  $m/z$  1796.2 (Figure 1, bottom row). The sample optimization process aimed to achieve a higher  
164 than 10-fold signal to noise ratio for the peaks at  $m/z$  1796.2 and  $m/z$  1919.2. For this purpose,  
165 the sample preparation procedure was divided into three steps: *i*) acid hydrolysis, *ii*) sample  
166 washing and *iii*) sample resuspension prior to MALDI-TOF analysis. Parameters such as the  
167 acetic acid concentration, the time of hydrolysis, the sample washing procedure after acid  
168 hydrolysis and the sample density after resuspension were adjusted accordingly. The final  
169 optimized protocol is detailed in the Materials and Methods section.

170

171 The optimized version of the MALDIxin test was validated using a panel of 40 *E. coli* clinical  
172 isolates (Table 1), including 19 MCR producers, 12 chromosomally-resistant isolates and 9  
173 colistin susceptible isolates. For all MCR producers in this panel both the native Lipid A peak  
174 and the additional pETN peak at  $m/z$  1919.2 was observed, independent of the amino acid

175 sequence of the MCR protein conferring colistin resistance. For colistin resistant isolates that  
176 were not found to carry an *mcr* gene by multiplex PCR (15), and are thus likely to harbor  
177 chromosomal mutations that lead to colistin resistance, we were able to detect a peak at  $m/z$   
178 1927.2, in addition to the native Lipid A peak. This signal corresponds to the addition of L-  
179 Ara4N to the 4'-phosphate of Lipid A, resulting in an increase of +131  $m/z$  compared to the  
180 native Lipid A peak (Figure 1, middle row). In several of these isolates, peaks at both  $m/z$   
181 1919.2 and  $m/z$  1927.2 were observed, suggesting that these organisms possess Lipid A  
182 species modified with both pETN and L-Ara4N (Table 1). Finally, for colistin susceptible *E.*  
183 *coli* clinical isolates, a single peak at  $m/z$  1796.2 was detected, confirming that the Lipid A in  
184 these strains is unmodified. Using these spectra, PRR values for all strains were calculated.  
185 Susceptible *E. coli* strains have a PRR value of 0, whilst all colistin-resistant isolates have a  
186 positive PRR value (Table 1). Whilst this PRR value should be used to determine if an isolate  
187 is resistant or susceptible to colistin, the contribution of each Lipid A modification (Figure 1)  
188 to the overall PRR value, and thus colistin resistance, can be assessed by calculation of  
189  $PRR^{1919}$  (pETN) and  $PRR^{1927}$  (L-Ara4N) values (Table 1).

190 **DISCUSSION**

191

192 The work presented here broadens the applicability of our previously developed MALDIxin  
193 test (13) and represents an unbiased, fast, robust, cost-effective and high-throughput method  
194 to detect colistin resistance in *E. coli* by directly assessing the biochemical cause of resistance  
195 *i.e.* the modification of Lipid A. Therefore, unlike PCR-based testing, this method will  
196 reliably identify clinical isolates harboring chromosomal mutations, *mcr* genes and novel  
197 colistin resistance determinants, such as emerging MCR members, regardless of the genetic  
198 basis of resistance. Indeed, by determining the Lipid A modification(s) responsible for  
199 colistin resistance through the calculation of PRR<sup>1919</sup> and PRR<sup>1927</sup> values, potential MCR-  
200 producers (*i.e.* those organisms where the PRR value arises solely from the addition of pETN  
201 to Lipid A) can be identified for future in-depth characterization.

202

203 For this analysis we used the recently released MALDI Biotyper Sirius mass spectrometer.  
204 This system differs from previous Biotyper systems as it can operate in both positive and  
205 negative ion modes. Analytes that are acidic in nature, such as those containing phosphate or  
206 carboxylate groups, are more efficiently ionized by the generation of anions (16). As such,  
207 detection of Lipid A, which contains both long chain fatty acid and phosphate groups (at  
208 carbon 1 and 4'), is superior when anions are generated using the negative ion mode.  
209 Therefore, the newly introduced negative ion mode of the MALDI Biotyper Sirius allows  
210 efficient detection of both native Lipid A and its modified forms. Nonetheless, although the  
211 MALDI Biotyper Sirius is the optimal mass spectrometer for the assay as described here,  
212 Lipid A can also be detected using any MALDI-TOF mass spectrometer supporting negative-  
213 ion mode. In addition to the newly introduced negative ion mode, the MALDIxin test uses a  
214 super-DHB MALDI matrix, as opposed to the  $\alpha$ -cyano-4-hydroxycinnamic acid (HCCA)

215 matrix routinely used for bacterial identification by MALDI-TOF mass spectrometry. Whilst  
216 both super-DHB and HCCA are traditional organic matrices, super-DHB is a binary mixture  
217 of two benzoic acid derivatives. Mixed matrices such as super-DHB offer improved yields  
218 and signal-to-noise ratios for analyte ions by altering the co-crystallization of the analyte and  
219 matrix components (17). Together, these two advances allow the MALDI Biotyper Sirius to  
220 be used for both bacterial identification and robust colistin resistance determination, through  
221 detection of native or modified Lipid A from whole bacterial colonies.

222

223 The modification of Lipid A is a common mechanism of colistin resistance in organisms  
224 beyond *E. coli*. As the structure of Lipid A from a range of bacterial species (including  
225 *Klebsiella pneumonia*, *Shigella* spp. and *Pseudomonas aeruginosa*) can be determined by  
226 MALDI-TOF mass spectrometry (18), this technique provides a broadly applicable basis for  
227 the development of new diagnostics in many species of Gram-negative bacteria. Indeed, the  
228 Lipid A of *Salmonella* spp., which have been reported to carry MCR-enzymes (19) is similar  
229 to that of *E. coli* and can be detected using the negative-ion mode of the MALDI Biotyper  
230 Sirius as a peak at  $m/z$  1796.2 (data not shown). Thus, it is likely that a similar +123  $m/z$   
231 addition to the native Lipid A peak will be observed in colistin resistant isolates of this  
232 organism. Similarly, Lipid A from *Acinetobacter baumannii* can be directly detected using  
233 MALDI-TOF mass spectrometry. Colistin resistance in this organism, primarily resulting  
234 from the overexpression of the chromosomally-encoded pETN transferase PmrC, can be  
235 detected as a +123  $m/z$  addition to the peak corresponding to native bis-phosphorylated hepta-  
236 acyl Lipid A (13). These observations suggest that the optimized version of the MALDIxin  
237 test presented here will have broad utility in detecting colistin resistance in a range of Gram-  
238 negative bacteria.

239

240 The diagnostic assay described in this study will initially be made available to users of the  
241 MALDI Biotyper Sirius, along with full application support, for research use only (RUO)  
242 validation studies. This will be followed by the transformation of an already existing, RUO,  
243 web-based automated algorithm (Bruker Daltonics) into a new MALDI Biotyper software  
244 module. Dedicated MALDIXin consumables (e.g. pre-portioned purified matrix, calibration  
245 standards) will also be developed to enable simplified and standardized performance of the  
246 assay. The successful deployment of the new software module, in conjunction with  
247 MALDIXin specific laboratory consumables, will allow the subsequent introduction of *in*  
248 *vitro* diagnostic (IVD) consumables and software, following further clinical and analytical  
249 studies. These steps will ultimately bring the MALDIXin test into clinical laboratories in the  
250 near future.

251

252 Overall, this study represents a major step towards for the routine application of MALDI-  
253 TOF-based detection of colistin resistance and lays the foundations for a rapid diagnostic test  
254 for colistin resistance that will be readily accessible to most clinical microbiology  
255 laboratories. As such adoption of the MALDI Biotyper Sirius, and the subsequent  
256 introduction of the MALDIXin test, will facilitate improved management and treatment of  
257 patients with challenging MDR Gram-negative infections.

258 **ACKNOWLEDGMENTS**

259

260 We acknowledge Prof. Youri GLUPCZYNSKI, Dr. Pierre BOGAERTS, Prof. Richard  
261 BONNET and IHMA Inc. Schaumburg for providing *E. coli* clinical isolates. This study was  
262 supported by the MRC Confidence in Concept Fund and the ISSF Wellcome Trust Grant  
263 105603/Z/14/Z (to G.L-M), as well as the MRC Career Development Award MR/M009505/1  
264 (to D.A.I.M.). L.D, A.F and G. L-M are co-inventors of the MALDIxin test for which a  
265 patent has been filed by Imperial Innovations.

## 266 REFERENCES

- 267 1. Rochford C, Sridhar D, Woods N, Saleh Z, Hartenstein L, Ahlawat H, Whiting E, Dybul M, Cars  
268 O, Goosby E, Cassels A, Velasquez G, Hoffman S, Baris E, Wadsworth J, Gyansa-Lutterodt M,  
269 Davies S. 2018. Global governance of antimicrobial resistance. *Lancet* 391:1976-1978.
- 270 2. Kontopidou F, Giamarellou H, Katerelos P, Maragos A, Kioumis I, Trikka-Graphakos E, Valakis  
271 C, Maltezou HC, Group for the Study of KPCpKpiiicu. 2014. Infections caused by carbapenem-  
272 resistant *Klebsiella pneumoniae* among patients in intensive care units in Greece: a multi-  
273 centre study on clinical outcome and therapeutic options. *Clin Microbiol Infect* 20:O117-23.
- 274 3. Falagas ME, Kasiakou SK. 2005. Colistin: the revival of polymyxins for the management of  
275 multidrug-resistant gram-negative bacterial infections. *Clin Infect Dis* 40:1333-41.
- 276 4. Jeannot K, Bolard A, Plesiat P. 2017. Resistance to polymyxins in Gram-negative organisms.  
277 *Int J Antimicrob Agents* 49:526-535.
- 278 5. Olaitan AO, Morand S, Rolain JM. 2014. Mechanisms of polymyxin resistance: acquired and  
279 intrinsic resistance in bacteria. *Front Microbiol* 5:643.
- 280 6. Poirel L, Jayol A, Nordmann P. 2017. Polymyxins: antibacterial activity, susceptibility testing,  
281 and resistance mechanisms encoded by plasmids or chromosomes. *Clin Microbiol Rev*  
282 30:557-596.
- 283 7. Liu YY, Wang Y, Walsh TR, Yi LX, Zhang R, Spencer J, Doi Y, Tian G, Dong B, Huang X, Yu LF, Gu  
284 D, Ren H, Chen X, Lv L, He D, Zhou H, Liang Z, Liu JH, Shen J. 2016. Emergence of plasmid-  
285 mediated colistin resistance mechanism MCR-1 in animals and human beings in China: a  
286 microbiological and molecular biological study. *Lancet Infect Dis* 16:161-8.
- 287 8. Zhang H, Hou M, Xu Y, Srinivas S, Huang M, Liu L, Feng Y. 2019. Action and mechanism of the  
288 colistin resistance enzyme MCR-4. *Commun Biol* 2:36.
- 289 9. Wang X, Wang Y, Zhou Y, Li J, Yin W, Wang S, Zhang S, Shen J, Shen Z, Wang Y. 2018.  
290 Emergence of a novel mobile colistin resistance gene, *mcr-8*, in NDM-producing *Klebsiella*  
291 *pneumoniae*. *Emerg Microbes Infect* 7:122.
- 292 10. Yang YQ, Li YX, Lei CW, Zhang AY, Wang HN. 2018. Novel plasmid-mediated colistin  
293 resistance gene *mcr-7.1* in *Klebsiella pneumoniae*. *J Antimicrob Chemother* 73:1791-1795.
- 294 11. Carroll LM, Gaballa A, Guldemann C, Sullivan G, Henderson LO, Wiedmann M. 2019.  
295 Identification of Novel Mobilized Colistin Resistance Gene *mcr-9* in a Multidrug-Resistant,  
296 Colistin-Susceptible *Salmonella enterica* Serotype Typhimurium Isolate. *MBio* 10.
- 297 12. Jayol A, Nordmann P, Lehours P, Poirel L, Dubois V. 2017. Comparison of methods for  
298 detection of plasmid-mediated and chromosomally encoded colistin resistance in  
299 *Enterobacteriaceae*. *Clin Microbiol Infect* doi:10.1016/j.cmi.2017.06.002.
- 300 13. Dortet L, Potron A, Bonnin RA, Plesiat P, Naas T, Filloux A, Larrouy-Maumus G. 2018. Rapid  
301 detection of colistin resistance in *Acinetobacter baumannii* using MALDI-TOF-based  
302 lipidomics on intact bacteria. *Sci Rep* 8:16910.
- 303 14. Dortet L, Bonnin RA, Pennisi I, Gauthier L, Jousset AB, Dabos L, Furniss RCD, Mavridou DAI,  
304 Bogaerts P, Glupczynski Y, Potron A, Plesiat P, Beyrouthy R, Robin F, Bonnet R, Naas T, Filloux  
305 A, Larrouy-Maumus G. 2018. Rapid detection and discrimination of chromosome- and MCR-  
306 plasmid-mediated resistance to polymyxins by MALDI-TOF MS in *Escherichia coli*: the  
307 MALDixin test. *J Antimicrob Chemother* 73:3359-3367.
- 308 15. Jousset AB, Bernabeu S, Bonnin RA, Creton E, Cotillon G, Sauvadet A, Naas T, Dortet L. 2019.  
309 Development and validation of a multiplex polymerase chain reaction assay for detection of  
310 the five families of plasmid-encoded colistin resistance. *Int J Antimicrob Agents* 53:302-309.
- 311 16. Leopold J, Popkova Y, Engel KM, Schiller J. 2018. Recent developments of useful MALDI  
312 matrices for the mass spectrometric characterization of lipids. *Biomolecules* 8.
- 313 17. Karas M, Ehring H, Nordhoff E, Stahl B, Strupat K, Hillenkamp F, Grehl M, Krebs B. 1993.  
314 Matrix-assisted laser-desorption ionization mass-spectrometry with additives to 2,5-  
315 dihydroxybenzoic acid. *Organic Mass Spectrometry* 28:1476-1481.

- 316 18. Larrouy-Maumus G, Clements A, Filloux A, McCarthy RR, Mostowy S. 2016. Direct detection  
317 of lipid A on intact Gram-negative bacteria by MALDI-TOF mass spectrometry. *Journal of*  
318 *Microbiological Methods* 120:68-71.
- 319 19. Lima T, Domingues S, Da Silva GJ. 2019. Plasmid-mediated colistin resistance in *Salmonella*  
320 *enterica*: a review. *Microorganisms* 7.

321

322

323

324

325

326

327

328

329

330

331

332

333

334

335

336

337

338

339

340

341

342

343

344

345

346

347

348 **FIGURE LEGENDS**



349

350 **Figure 1.** Representative mass spectra of native and modified *E. coli* Lipid A acquired using  
351 the linear negative-ion mode of a MALDI Biotyper Sirius system (Bruker Daltonics). Native  
352 *E. coli* Lipid A is detected as one major peak at  $m/z$  1796.2 (top row). Lipid A from colistin-  
353 resistant *E. coli* isolates carrying chromosomal mutations is modified by L-Ara4N which is  
354 detected as an additional peak at  $m/z$  1927.2 (highlighted in orange) (middle row) and/or  
355 pETN which is detected as an additional peak at  $m/z$  1919.2 (highlighted in blue) (bottom  
356 row). Lipid A from strains exhibiting MCR-mediated resistance to colistin is only modified  
357 by pETN (bottom row); the spectrum shown is typical of an *mcr*-carrying isolate. Insets show  
358 the corresponding structures of native and modified Lipid A with the L-Ara4N and pETN  
359 modifications highlighted as appropriate.

360

361 **Table 1.** PRR values for the MCR-producing *E. coli* clones, colistin-resistant clinical *E. coli*  
362 strains and susceptible *E. coli* strains used in this study. PRR is calculated by summing the  
363 intensities of the Lipid A peaks attributed to the addition of pETN ( $m/z$  1919.2) and L-Ara4N  
364 ( $m/z$  1927.2) and dividing this number by the intensity of the peak corresponding to native  
365 Lipid A ( $m/z$  1796.2);  $PRR = (1919.2 \text{ intensity} + 1927.2 \text{ intensity}) / 1796.2 \text{ intensity}$ .  $PRR^{1919}$   
366 and  $PRR^{1927}$  indicate the contribution of specific Lipid A modification(s) (pETN and/or L-  
367 Ara4N) to the overall PRR value.  $PRR^{1919}$  and  $PRR^{1927}$  are calculated by dividing the  
368 intensity of the peak at the appropriate  $m/z$  ( $m/z$  1919.2 and  $m/z$  1927.2 for pETN and L-  
369 Ara4N addition, respectively) by the intensity of the peak corresponding to native Lipid A  
370 ( $m/z$  1796.2).

371

**Table 1.** PRR values for the MCR-producing *E. coli* clones, colistin-resistant clinical *E. coli* strains and susceptible *E. coli* strains used in this study. PRR is calculated by summing the intensities of the Lipid A peaks attributed to the addition of pETN (*m/z* 1919.2) and L-Ara4N (*m/z* 1927.2) and dividing this number by the intensity of the peak corresponding to native Lipid A (*m/z* 1796.2);  $PRR = (1919.2 \text{ intensity} + 1927.2 \text{ intensity}) / 1796.2 \text{ intensity}$ . PRR<sup>1919</sup> and PRR<sup>1927</sup> indicate the contribution of specific Lipid A modification(s) (pETN and/or L-Ara4N) to the overall PRR value. PRR<sup>1919</sup> and PRR<sup>1927</sup> are calculated by dividing the intensity of the peak at the appropriate *m/z* (*m/z* 1919.2 and *m/z* 1927.2 for pETN and L-Ara4N addition, respectively) by the intensity of the peak corresponding to native Lipid A (*m/z* 1796.2).

| Strain name                                                  | Colistin MIC (mg/L) | Resistance mechanism | Additional $\beta$ -lactamase genes | PRR       | PRR <sup>1919</sup> | PRR <sup>1927</sup> |
|--------------------------------------------------------------|---------------------|----------------------|-------------------------------------|-----------|---------------------|---------------------|
| <b>MCR-producing <i>E. coli</i> clones</b>                   |                     |                      |                                     |           |                     |                     |
| MC1000 pDM1- <i>mcr-1</i>                                    | 4                   | <i>mcr-1</i>         | -                                   | 6.63±0.68 | 6.63±0.68           | 0.00±0.00           |
| MC1000 pDM1- <i>mcr-2</i>                                    | 4                   | <i>mcr-2</i>         | -                                   | 4.80±0.72 | 4.80±0.72           | 0.00±0.00           |
| MC1000 pDM1- <i>mcr-3</i>                                    | 4                   | <i>mcr-3</i>         | -                                   | 4.54±0.15 | 4.54±0.15           | 0.00±0.00           |
| MC1000 pDM1- <i>mcr-4</i>                                    | 4                   | <i>mcr-4</i>         | -                                   | 4.47±0.78 | 4.47±0.78           | 0.00±0.00           |
| MC1000 pDM1- <i>mcr-5</i>                                    | 4                   | <i>mcr-5</i>         | -                                   | 4.00±1.29 | 4.00±1.29           | 0.00±0.00           |
| MC1000 pDM1- <i>mcr-8</i>                                    | 4                   | <i>mcr-8</i>         | -                                   | 3.36±1.44 | 3.36±1.44           | 0.00±0.00           |
| MC1000 pDM1                                                  | 0.5                 | -                    | -                                   | 0.00±0.00 | 0.00±0.00           | 0.00±0.00           |
| <b>Colistin resistant strains harboring <i>mcr</i> genes</b> |                     |                      |                                     |           |                     |                     |
| CNR 20140385                                                 | 4                   | <i>mcr-1</i>         | OXA-48                              | 0.91±0.18 | 0.91±0.18           | 0.00±0.00           |
| S08-056                                                      | 4                   | <i>mcr-1</i>         | OXA-48                              | 1.86±0.28 | 1.86±0.28           | 0.00±0.00           |
| CNR 117 G7                                                   | 4                   | <i>mcr-1</i>         | NDM-1                               | 1.70±0.68 | 1.70±0.68           | 0.00±0.00           |
| CNR 1745                                                     | 4                   | <i>mcr-1</i>         | SHV-12                              | 1.65±0.02 | 1.65±0.02           | 0.00±0.00           |
| CNR 1604                                                     | 4                   | <i>mcr-1</i>         | CTX-M-15                            | 1.98±0.30 | 1.98±0.30           | 0.00±0.00           |
| CNR 1790                                                     | 4                   | <i>mcr-1</i>         | TEM-15                              | 1.37±0.05 | 1.37±0.05           | 0.00±0.00           |
| CNR 1859                                                     | 4                   | <i>mcr-1</i>         | CTX-M-15,<br>SHV-12,<br>TEM-1       | 2.95±0.10 | 2.95±0.10           | 0.00±0.00           |
| CNR 1886                                                     | 4                   | <i>mcr-1</i>         | CTX-M-1,<br>TEM-1                   | 1.05±0.11 | 1.05±0.11           | 0.00±0.00           |
| 4222                                                         | 4                   | <i>mcr-1</i>         | CTX-M-2                             | 1.75±0.42 | 1.75±0.42           | 0.00±0.00           |
| 4070                                                         | 4                   | <i>mcr-1</i>         | TEM-1B                              | 0.98±0.03 | 0.98±0.03           | 0.00±0.00           |
| 979                                                          | 4                   | <i>mcr-1</i>         | CTX-M-2                             | 1.75±0.26 | 1.75±0.26           | 0.00±0.00           |
| 1724                                                         | 4                   | <i>mcr-1</i>         | -                                   | 1.28±1.21 | 1.28±1.21           | 0.00±0.00           |

|                  |   |                |          |           |           |           |
|------------------|---|----------------|----------|-----------|-----------|-----------|
| CNR 164 A5       | 4 | <i>mcr-1</i>   | -        | 1.56±0.44 | 1.56±0.44 | 0.00±0.00 |
| 1670             | 4 | <i>mcr-1.5</i> | CTX-M-2  | 1.21±0.32 | 1.21±0.32 | 0.00±0.00 |
| 6383             | 4 | <i>mcr-1.5</i> | TEM-1B   | 1.75±0.08 | 1.75±0.08 | 0.00±0.00 |
| R12 F5           | 4 | <i>mcr-2</i>   | -        | 0.66±0.08 | 0.66±0.08 | 0.00±0.00 |
| 37922            | 4 | <i>mcr-3.2</i> | CTX-M-55 | 1.52±0.18 | 1.52±0.18 | 0.00±0.00 |
| 1144230          | 4 | <i>mcr-5</i>   | CMY-2    | 1.09±0.20 | 1.09±0.20 | 0.00±0.00 |
| J53 pMCR-8 (Kpn) | 4 | <i>mcr-8</i>   | -        | 0.25±0.03 | 0.25±0.03 | 0.00±0.00 |

**Colistin resistant strains**

|              |    |                         |               |           |           |           |
|--------------|----|-------------------------|---------------|-----------|-----------|-----------|
| CNR 111 J7   | 8  | PmrB (D14N, S71C, V83A) | -             | 1.17±1.02 | 0.40±0.50 | 0.80±0.50 |
| CNR 20160039 | 4  | unknown                 | penicillinase | 1.40±0.13 | 0.50±0.10 | 0.90±0.10 |
| CNR 20160235 | 4  | MgrB (V8A)              | -             | 0.90±0.31 | 0.00±0.00 | 0.90±0.31 |
| CNR 1728     | 8  | PmrB (G160E)            | -             | 1.22±0.34 | 0.50±0.10 | 0.70±0.20 |
| CNR 187 G3   | 4  | unknown                 | NDM-5         | 0.09±0.00 | 0.00±0.00 | 0.10±0.00 |
| CNR 189 E5   | 4  | unknown                 | NDM-5         | 0.08±0.00 | 0.00±0.00 | 0.10±0.00 |
| CNR 169 D6   | 4  | unknown                 | OXA-48        | 0.21±0.00 | 0.00±0.00 | 0.20±0.00 |
| CNR 165 J9   | 4  | unknown                 | ESBL          | 0.86±0.01 | 0.00±0.00 | 0.90±0.00 |
| CNR 196 G2   | 4  | unknown                 | ESBL          | 1.01±0.35 | 1.00±0.4  | 0.00±0.00 |
| CNR 169 F2   | 8  | unknown                 | -             | 0.56±0.11 | 0.00±0.00 | 0.60±0.10 |
| CNR 198 E2   | 8  | unknown                 | -             | 0.44±0.06 | 0.00±0.00 | 0.40±0.10 |
| CNR 181 D5   | 16 | unknown                 | VIM-1         | 0.07±0.00 | 0.6±0.00  | 0.10±0.00 |

**Colistin susceptible strains**

|            |      |   |                              |           |           |           |
|------------|------|---|------------------------------|-----------|-----------|-----------|
| J53        | 0.5  | - | -                            | 0.00±0.00 | 0.00±0.00 | 0.00±0.00 |
| 1608071881 | 0.25 | - | -                            | 0.00±0.00 | 0.00±0.00 | 0.00±0.00 |
| 1608075385 | 0.12 | - | penicillinase                | 0.00±0.00 | 0.00±0.00 | 0.00±0.00 |
| 1608078105 | 0.25 | - | penicillinase                | 0.00±0.00 | 0.00±0.00 | 0.00±0.00 |
| 2H6        | 0.25 | - | CTX-M-15                     | 0.00±0.00 | 0.00±0.00 | 0.00±0.00 |
| 2 E10      | 0.25 | - | CTX-M-14                     | 0.00±0.00 | 0.00±0.00 | 0.00±0.00 |
| 1A6        | 0.25 | - | NDM-4,<br>CTX-M-15,<br>OXA-1 | 0.00±0.00 | 0.00±0.00 | 0.00±0.00 |
| 1C2        | 0.5  | - | VIM-1                        | 0.00±0.00 | 0.00±0.00 | 0.00±0.00 |
| 2A1        | 0.25 | - | OXA-48,<br>CTX-M-15          | 0.00±0.00 | 0.00±0.00 | 0.00±0.00 |

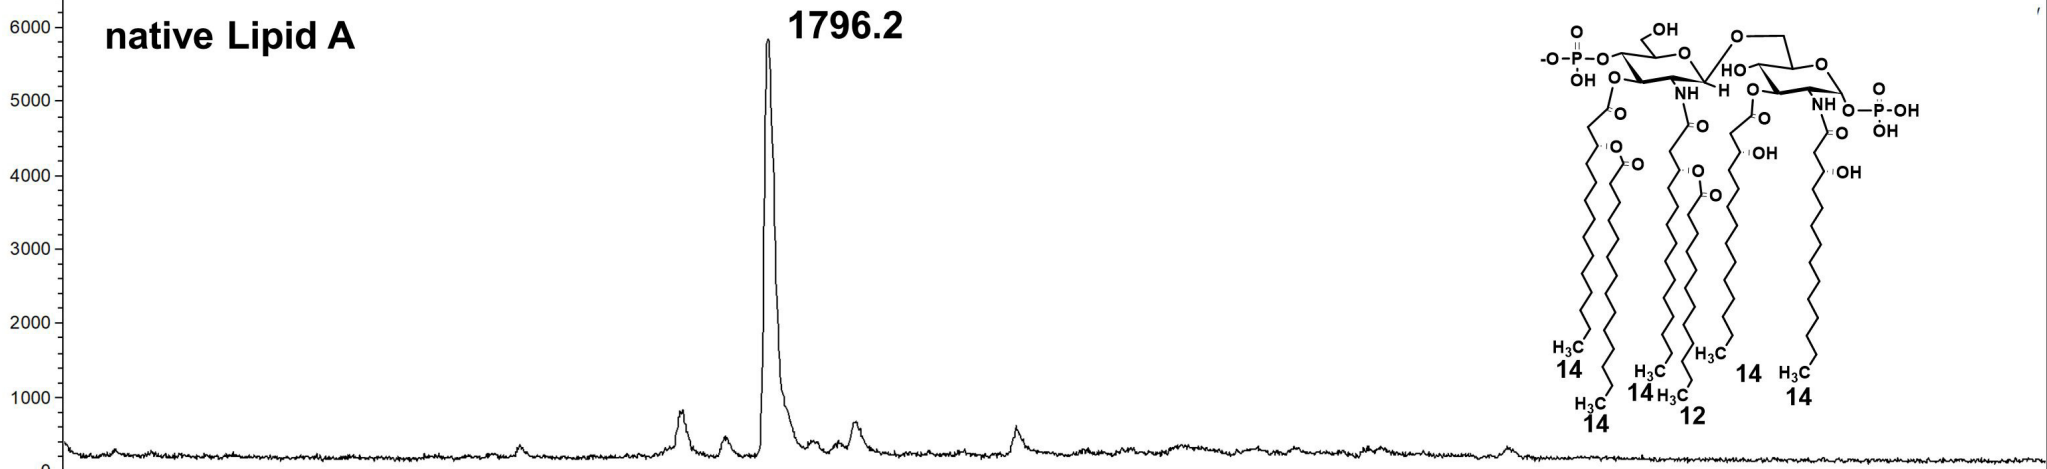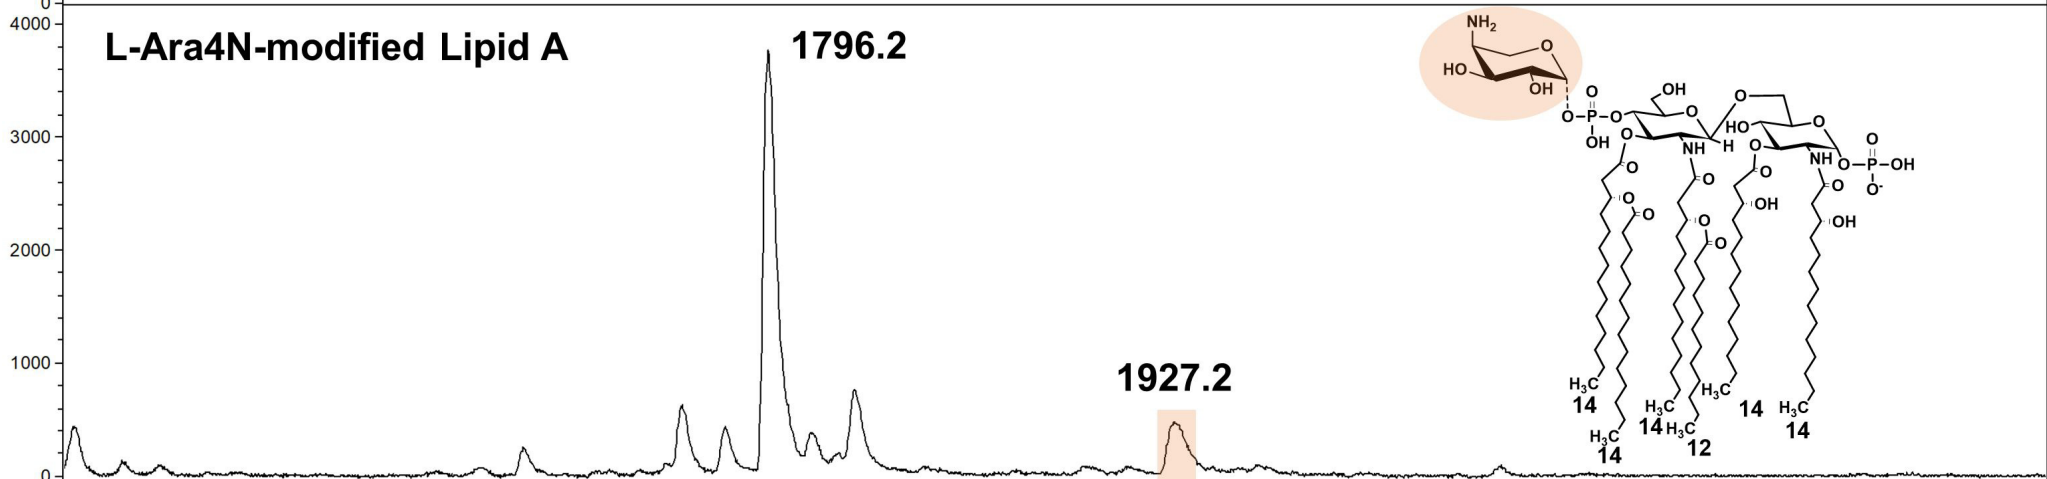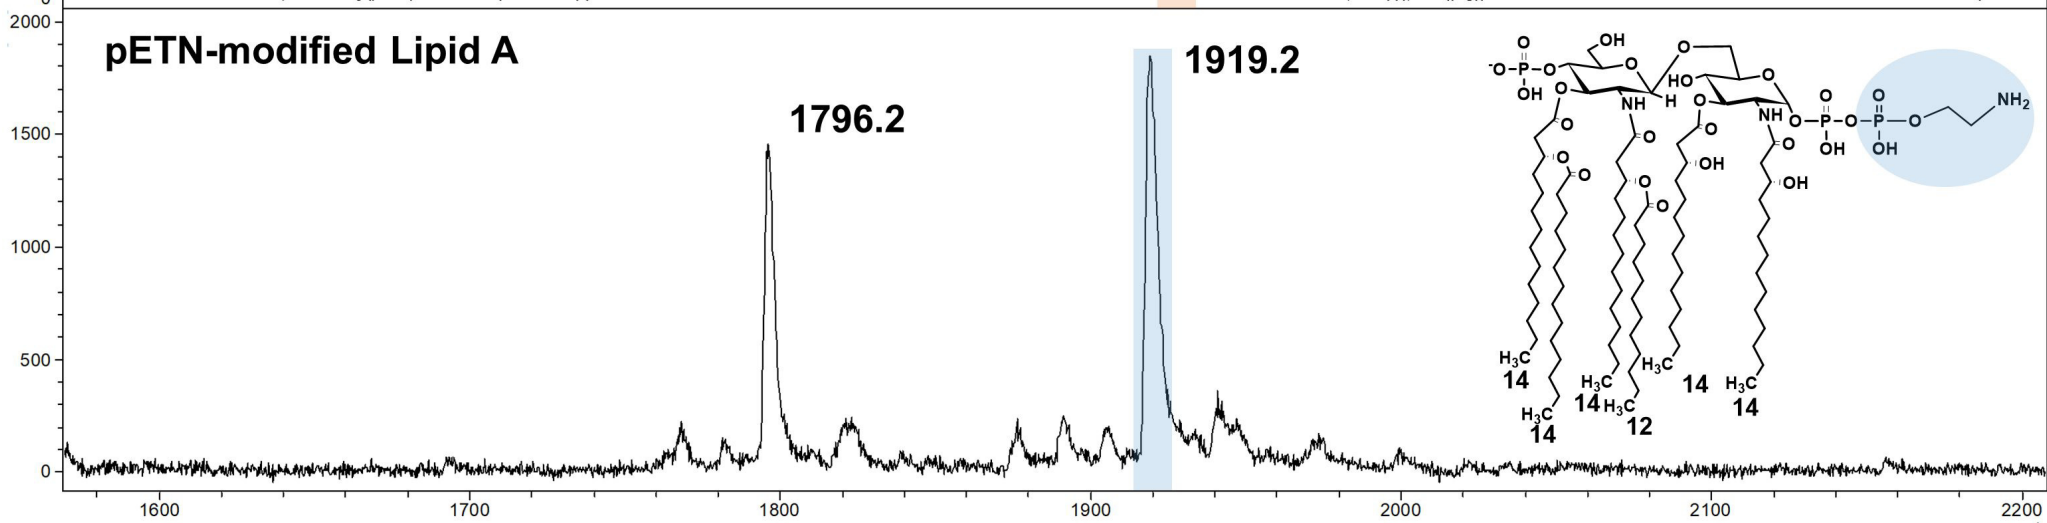

Source: https://www.biorxiv.org/content/10.1101/752600v1.full.pdf
